1 **Title:** Natural variation in the contribution of microbial density to inducible immune dynamics

2 **Running title:** Microbe density and inducible immunity

3 Derrick Jent, Abby Perry, Justin Critchlow, Ann T. Tate\*

4 Department of Biological Sciences, Vanderbilt University. Nashville, TN 37232

5 \*Corresponding author: [a.tate@vanderbilt.edu](mailto:a.tate@vanderbilt.edu)

6

7

8

9

10

11

12

13

14

15

16

17

18

19

20

21 **Abstract**

22 Immune responses evolve to balance the benefits of microbial killing against the costs of autoimmunity  
23 and energetic resource use. Models that explore the evolution of optimal immune responses generally  
24 include a term for constitutive immunity, or the level of immunological investment prior to microbial  
25 exposure, and for inducible immunity, or investment in immune function after microbial challenge.  
26 However, studies rarely consider the functional form of inducible immune responses with respect to  
27 microbial density, despite the theoretical dependence of immune system evolution on microbe- versus  
28 immune-mediated damage to the host. In this study, we analyze antimicrobial peptide (AMP) gene  
29 expression from seven wild-caught flour beetle populations (*Tribolium* spp.) during acute infection with  
30 the virulent bacteria *Bacillus thuringiensis* (Bt) and *Photorhabdus luminescens* (P.lum) to demonstrate  
31 that inducible immune responses mediated by the humoral IMD pathway exhibit natural variation in both  
32 microbe density-dependent and independent temporal dynamics. Beetle populations that exhibited greater  
33 AMP expression sensitivity to Bt density were also more likely to die from infection, while populations  
34 that exhibited higher microbe density-independent AMP expression were more likely to survive *P.*  
35 *luminescens* infection. Reduction in pathway signaling efficiency through RNAi-mediated knockdown of  
36 the *imd* gene reduced the magnitude of both microbe-independent and dependent responses and reduced  
37 host resistance to Bt growth, but had no net effect on host survival. This study provides a framework for  
38 understanding natural variation in the flexibility of investment in inducible immune responses and should  
39 inform theory on the contribution of non-equilibrium host-microbe dynamics to immune system  
40 evolution.

41

42 **Keywords:** ecological immunology, infection tolerance, life history trade-offs, host-parasite interactions,  
43 innate immunity, *Tribolium castaneum*, *Bacillus thuringiensis*

44

## 45 **Introduction**

46           Mounting and maintaining an immune response is costly to organismal fitness. Investment in  
47 immunity requires the diversion of energetic resources away from processes like development and  
48 reproduction (Bajgar *et al.* 2015), and immune responses can impose pathological collateral damage upon  
49 host tissue (Sadd & Siva-Jothy 2006). In addition, immune defenses that are effective against one parasite  
50 might trade off with the production of immune responses effective against other parasites (Murphy *et al.*  
51 2013; Ezenwa *et al.* 2010), or even directly facilitate their colonization (Dejnirattisai *et al.* 2010). These  
52 constraints contribute to the conceptual division between constitutive immunity, where hosts invest in  
53 immunity prior to exposure to a focal microbe, and inducible immunity, where hosts invest in an immune  
54 response, and pay the associated consequences (Ardia *et al.* 2012), only after microbial exposure.

55           The relative costs and benefits of constitutive and inducible immunity, and the associated  
56 implications for immune system evolution, have received appreciable theoretical and experimental  
57 attention. For example, an experiment that evolved *Pseudomonas aeruginosa* resistance to a mu-like  
58 phage under high and low resource environments found that in high resource environments, the bacteria  
59 evolved constitutive resistance to phage through the loss of a surface receptor, while low resource  
60 environments favored the inducible CRISPR-Cas system (Westra *et al.* 2015). A mathematical model  
61 created by Hamilton and colleagues (Hamilton *et al.* 2008) suggests that highly predictable parasite  
62 growth rates should always favor modulation of constitutive investment, whereas variation or  
63 unpredictability in parasite growth rates should favor a combination of constitutive and inducible  
64 investment. Other models add to these predictions by suggesting that longer inducible time delays (Shudo  
65 & Iwasa 2001) and developmental constraints on inducible immune investment (Tate & Graham 2015a)  
66 should further favor constitutive defense, while variation in the types of costs associated with constitutive  
67 and inducible responses could favor differential investment in recovery rates after infection (Cressler *et*  
68 *al.* 2015).

69 Inducible immunity is easy to define in broad strokes as the change in immune defense after  
70 microbial exposure. However, it is less clear to what extent time and microbe density feed back on its  
71 continued production, or how these feedbacks might ultimately influence the costs that drive immune  
72 system evolution. The Hamilton *et al.* model (Hamilton *et al.* 2008), for example, assumes that inducible  
73 immunity increases exponentially with parasite density, whereas the Shudo and Iwasa model (Shudo &  
74 Iwasa 2001) assumes a step-wise rate of inducible response generation that is not sensitive to microbial  
75 dynamics. Another model of inducible immune response evolution proposes both microbe density-  
76 independent and dependent terms for the rate of immune induction (Frank 2002), but keeps the latter  
77 constant when analyzing the sensitivity of host fitness to parameter variation. As with the contrasting cost  
78 structure of constitutive and inducible immunity, microbe independent and dependent inducible dynamics  
79 should experience trade-offs associated with paying a sunk cost while getting proactive benefits versus  
80 investing only when needed but ceding the temporal advantage to the microbes. Intuitively, then, we  
81 might predict that microbe-independent inducible responses would be favored against fast-growing,  
82 manipulative, or virulent parasites, whereas microbe-dependent terms might be favored by variable  
83 parasite exposure rates or virulence characteristics that depend on microbe density. We might additionally  
84 expect that microbe density-dependent inducible immunity would be useful in controlling endosymbiont  
85 or gut microbe populations (Login *et al.* 2011), where host fitness and the benefits of tolerance may be  
86 optimized at intermediate microbe density, disfavoring systems that are switched on by the mere presence  
87 or absence of microbes.

88 A better understanding of natural variation in the sensitivity of inducible immune dynamics to  
89 time and changes in the microbial population, therefore, would improve our conceptual and theoretical  
90 frameworks for immune system evolution. Unfortunately, data on the relative rates of microbe dependent  
91 and independent inducible immune dynamics are sparser than the mathematical models that employ them.  
92 Nevertheless, recent data from fruit flies infected with bacteria (Louie *et al.* 2016) and viruses (Gupta &  
93 Vale 2017), as well as flour beetles infected with bacteria (Tate & Graham 2017), suggest that the

94 inducible expression of antimicrobial peptides (AMPs) controlled by humoral signaling pathways  
95 (particularly IMD, but also Toll and Jak-STAT) are strongly correlated to microbe density during both  
96 acute (Tate & Graham 2017) and recovery (Louie *et al.* 2016) phases of infection. These studies suggest  
97 that microbe density-dependent feedbacks might indeed be an important component of inducible  
98 dynamics. However, all these studies were performed using a few laboratory host strains. A better  
99 understanding of natural variation in the functional form of inducible dynamics with respect to microbe  
100 density would inform future mathematical models of immune system evolution and promote deeper  
101 consideration of a ubiquitous immune system trait.

102         To test the hypothesis that the evolutionary costs and benefits of microbe-independent and –  
103 dependent inducible immune responses depend on the context of infection and are thus likely to vary  
104 among populations, we infected seven wild-caught flour beetle (*Tribolium castaneum* and *T. confusum*)  
105 populations with one of two entomopathogenic bacteria, the rapidly growing and virulent *Bacillus*  
106 *thuringiensis* (Bt) and the slower-growing but immuno-modulatory *Photorhabdus luminescens* (P.lum).  
107 To quantify inducible immune gene expression, we infected individuals from each population with a  
108 gradient of initial bacterial doses or a sterile wound and then sacrificed them during a point in the acute  
109 infection phase that is late enough to avoid lag in the induction of immunity but prior to the onset of host  
110 mortality (Tate *et al.* 2017). Using RT-qPCR, we quantify the impact of natural variation and humoral  
111 (IMD) immune pathway signaling efficiency on the intercept (microbe-independent) and slope (microbe-  
112 sensitive) of the relationship between microbe density and immune gene transcription. We then identify  
113 intriguing correlations between immune parameters and host resistance and survival against bacterial  
114 infection. These results give basic insight into the evolution and dynamics of inducible immune  
115 responses, and should inspire future experiments that assay microbe density so that we can better  
116 understand the costs and benefits of immune sensitivity to microbial burden.

117

118 **Materials and Methods**

## 119 ***Beetle sources and rearing***

120           The wild-derived beetles used in these experiments were obtained by setting pheromone-baited  
121 dome traps (Trece) at feed stores and grain elevators around Pennsylvania (June 2013; Snavely *T.*  
122 *confusum* and *T. castaneum*), middle Tennessee (June 2017; Marshall *T. confusum*) and southern  
123 Kentucky (June 2017; Green River *T. confusum* and *T. castaneum*, Dorris *T. castaneum*, WF Ware *T.*  
124 *castaneum*). Traps were reset and beetles collected weekly for five weeks. We created breeding  
125 populations in the lab from at least 20 active adult beetles per population. Most populations were  
126 naturally infected with protozoan parasites, so to create uninfected colonies, we bathed eggs derived from  
127 each breeding population in 1% Virkon and rinsed them 2 times in saline solution before passaging them  
128 to clean flour for hatching. This method reliably produces protozoan-free populations (Tate & Graham  
129 2015b), and lack of parasites was confirmed by dissection of 20 adult and larval beetles in the F1 and F2  
130 generations coupled with inspection of frass via microscopy for presence of gametocysts. All beetle  
131 populations were also inspected for infection with other bacteria, protozoa, and microsporidia via  
132 dissection and microscopy, and were observed for 2 generations to ensure no unexplained mortality.

## 133 ***Creation of experimental groups***

134           For all experiments, we derived experimental larvae from breeding groups created by placing 40  
135 adults from a stock colony in a petri dish with flour and allowing them to lay eggs for 48 hours,  
136 whereupon the adults were passaged to a new petri dish and larvae were provided with *ad libitum* flour  
137 through development. As size can influence mortality rates, 4.5mm larvae were selected from these  
138 breeding groups for infection experiments, thus controlling for both size and age.

## 139 ***Bt Infection Experiments***

140           *Bacillus thuringiensis* is a spore-producing entomopathogen that relies on host killing for  
141 transmission (Raymond *et al.* 2010). Whether it naturally enters the host through the gut or is septicly  
142 injected, it grows rapidly in the hemolymph of infected beetles and kills them within 12 hours (Tate *et al.*

143 2017). To infect beetles with Bt (ATCC 55177, a berliner strain that contains a cry protein strain active  
144 against Coleoptera), we prepared a culture from a glycerol stock kept at -80°C and grown overnight in  
145 10mL of Nutrient Broth #3 (Sigma Aldrich). In the morning, we transferred 200uL of the overnight  
146 culture to 3 mL of fresh NB and brought to an OD of 0.5 to produce the log phase culture. We created the  
147 initial doses for all experiments by mixing 500uL overnight culture with 500uL log phase culture  
148 (approximately  $1 \times 10^8$  colony forming units (CFU)/mL), and then aliquoting a volume of this mixture to  
149 sterile NB with volumes that produced four two-fold dilutions (dose 1 (~50 CFU/needle prick), dose 2  
150 (100 CFU, the dose that kills ~50% of hosts (LD50)), dose 4 (200 CFU), and dose 8 (800 CFU)), as well  
151 as a sterile NB control (dose “0”) or a naïve control where insects were handled but not pricked. We  
152 infected beetles by dipping an ultrafine insect pin in the bacterial or injection control solutions, and then  
153 punctured the beetle under the sixth segment (larvae) or between the head and pronotum (adults). All  
154 beetles were kept in individual wells of 96 well plates at 30°C after treatment.

155 **Experiment 1: Bt density and gene expression over 4 initial doses.** For bacterial and gene expression  
156 assays, all beetles from each population (N = 6-10 beetles/dose/population) were sacrificed at 8 hours  
157 post infection by flash freezing and stored at -80°C until processing. We stratified beetles into different  
158 bacterial dose treatments, as described above, to ensure a continuous gradient of bacterial density  
159 spanning several orders of magnitude upon cross-sectional sampling.

160 **Experiment 2: Host survival after Bt infection and bacterial load at time of death.** For survival  
161 assays (N = 50-60/population/experiment), individual mortality after infection with dose 2 (100  
162 CFU/needle prick) or sterile NB (wounding control) was monitored every 30 minutes for 12 hours (peak  
163 mortality 8-11 hours) and then again at 24 hours post infection. Survival experiments were conducted in  
164 two blocks. The first included all populations except for Marshall, which was inadvertently excluded from  
165 breeding group setup, and the second included Marshall alongside Snavely *T. confusum* and *T. castaneum*  
166 as comparison groups. The second block received a slightly higher initial dose (190 CFU/needle prick),  
167 resulting in a higher average mortality rate (**Fig. 1A, B**). Individuals that died prior to 4 hours post

168 infection (0-5%) were discarded from the analysis, as mortality is a result of trauma rather than bacterial  
169 infection. For estimating bacterial load at time of death (BLUD), individuals were collected as soon as  
170 they demonstrated moribund behavior (legs in air, feeble response to touching) and immediately flash-  
171 frozen for storage at -80°C.

### 172 **Experiment 3: Survival, bacterial density, and host gene expression after *P.lum* infection.**

173 *Photorhabdus luminescens* is an entomopathogenic symbiont of parasitic nematodes. In nature, it is  
174 introduced into the insect hemolymph after the nematode penetrates the cuticle, and is responsible for  
175 suppressing host immune responses (Ciche & Ensign 2003) and killing the host so that that nematode can  
176 complete its life cycle. To infect beetles with *P. luminescens* (*P.lum*, ATCC 29999), we prepared an  
177 overnight culture from glycerol stocks of the bacterium in Nutrient Broth at 30 °C. We combined 500 uL  
178 of log phase culture (OD = 0.405) and 500uL of overnight culture (OD = 1.46), centrifuged it and  
179 resuspended the pellet in 450uL of NB, which delivered approximately 250 CFU per needle prick, as  
180 determined by plating needle contents. For bacterial and gene expression assays (N = 10 naïve control, N  
181 = 10 NB control, N = 20 *P.lum* infection per population), all beetles were sacrificed at 14 hours post  
182 infection by flash freezing and stored at -80°C until processing. For survival assays (N = 50-  
183 60/population), individual mortality was monitored every 30 minutes from 12-24 hours post infection  
184 (peak mortality 16-20 hours).

185 **Experiment 4: The effect of IMD pathway signaling on immune sensitivity.** We obtained primer  
186 sequences for *T. castaneum imd* dsRNA template from the iBeetle Database (Dönitz *et al.* 2014) (**Table**  
187 **S1**). We produced T7 promoter sequence-tagged DNA via PCR (Platinum Green Hot Start kit, Invitrogen)  
188 from *T. castaneum* cDNA, and purified the product using the QIAquick PCR Purification kit (Qiagen),  
189 followed by overnight dsRNA synthesis (Megascript T7 kit, Invitrogen) as described in (Posnien *et al.*  
190 2009). We similarly created dsRNA against a maltose binding protein E (*malE*) sequence using *E. coli*  
191 DNA as a template (Yokoi *et al.* 2012a) to serve as a control for the effect of RNAi induction. We  
192 quantified knock-down efficiency (87%) by comparing *imd* expression in IMD-RNAi and *MalE*-RNAi



193 groups relative to the RPS18 reference gene. There was no significant difference in constitutive *imd*  
194 expression among MalE-RNAi beetles and completely naïve beetles.

195 We obtained a cohort of Snavely *T. castaneum* larvae and assigned them to either a control group  
196 injected with MalE dsRNA or an *imd*-RNAi group. We injected them with 0.5ug dsRNA dissolved in 1uL  
197 sterile insect saline + green dye, as described in (Posnien *et al.* 2009). Three days later, we assigned  
198 undamaged individuals from each RNAi treatment group to a sterile saline control or one of four Bt doses  
199 as in Experiment 1 (N = ~ 8 individuals/dose/ RNAi treatment), and sacrificed them at 8 hours post  
200 injection. We excluded two individuals from the *imd*-RNAi group from the analysis because they had not  
201 received proper dsRNA injections, as evidenced by normal *imd* expression. We infected an additional 60  
202 individuals from the MalE and IMD treatment groups with dose 2 (approximately 100 CFU) to monitor  
203 survival over 24 hours post Bt infection. We repeated dose1 infections again (50 CFU, N = 11/group) and  
204 sacrificed individuals at 6 hours post infection to obtain more normally distributed bacterial density  
205 estimates.

### 206 ***RT-qPCR Primer Design***

207 We chose immune genes to assay based on a previous study that suggests that their expression is  
208 correlated to Bt density (Tate & Graham 2017) and where we know the humoral pathways that modulate  
209 their expression: the IMD pathway (the AMP *attacin-1* (TC007737) and the recognition protein *pgrp-sc2*  
210 (TC013620)), the Toll pathway (the AMP *cecropin-3* (TC000500)), or both (the AMP *defensin-1*  
211 (TC006250)) in *T. castaneum* (Koyama *et al.* 2015; Yokoi *et al.* 2012a). Additionally, we assayed *dopa*  
212 *decarboxylase* (*ddc*, TC013480) expression because it is an important enzyme in the melanization  
213 pathway (Huang *et al.* 2005), although our results subsequently suggested that its expression may be  
214 correlated to IMD pathway-regulated genes (**Fig. S1**) and therefore may not accurately represent  
215 melanization dynamics. A primary concern of primer design was to ensure that each primer set amplified  
216 the intended target to the same efficiency and Ct range in both *T. castaneum* and *T. confusum*. We  
217 designed several degenerate primer sets per gene by comparing CDS sequences from NCBI for *T.*

218 *castaneum* against *T. confusum* draft sequences provided by Jeffery Demuth (personal comm.). We tested  
219 the efficiency of each primer set against cDNA derived from Snavely *T. confusum* and *T. castaneum*  
220 individuals. To capture reference gene expression, we used the RPS18 primer set provided in (Lord *et al.*  
221 2010), which had previously demonstrated that the expression of this gene is constant across stages of  
222 fungal infection. Primers that performed with high efficiency and equivalently in both species are listed in  
223 **Table S1**. We used previously published primers (Tate *et al.* 2017; Tate & Graham 2015b) to quantify Bt  
224 density relative to host tissue (**Table S1**), where the amplified product has been previously shown to  
225 correlate strongly with bacterial CFU as determined by samples plated on agar (Tate & Graham 2015b).

### 226 *Nucleic Acid Processing and RT-qPCR*

227 We extracted total RNA from all individual beetles using the RNeasy Mini Kit (Qiagen)  
228 according to the manufacturer's instructions. We reverse-transcribed 40-80ng RNA to cDNA using  
229 quarter-reactions of the Superscript IV VILO MasterMix kit (Invitrogen), and diluted cDNA with 40uL  
230 nuclease-free water. Within each experiment, we performed qPCR for each transcript template using  
231 PowerUp Sybr Green Master Mix (Life Technologies) on the QuantStudio 6 machine (Applied  
232 Biosystems) by running all individuals on the same 384-well plate in duplicate, where possible, using  
233 default settings unless indicated in Table S1. We confirmed equivalent Ct thresholds and ran a subset of  
234 individuals on both plates to minimize plate effects, as in (Tate *et al.* 2017).

### 235 *Statistical Analysis*

236 For the qPCR data, we calculated  $\Delta C_t$  (cycle quantification) values (target gene Ct – reference  
237 gene Ct) for each gene template for each individual. These values were linearized ( $2^{-\Delta C_t}$ ) prior to analysis  
238 and then log<sub>10</sub>-transformed for normality, as in (Tate *et al.* 2017; Tate & Graham 2017). These data are  
239 available through the Dryad Digital Repository (Accession XXX). To compare constitutive (naïve  
240 individuals) and microbe recognition-independent inducible responses (NB-injected control groups (dose  
241 0)) across populations, we compared gene expression values in the using linear models (“lm” or “aov”

242 functions in R depending on desired output; model = relative expression ~ treatment or population).  
243 Models of immune sensitivity and magnitude, where relative immune gene expression is the dependent  
244 variable, took the form of: relative expression ~ bacterial density + treatment + bacterial density \*  
245 treatment, where data from all doses were used. For the latter model, we interpreted a significant main  
246 effect of treatment as indicating an overall difference in expression independent of microbe density, while  
247 a significant microbe density term indicated that the expression of the gene was sensitive to microbe  
248 density. A significant interaction term indicated differences in immune sensitivity (the slope of microbe-  
249 dependent expression) among treatments or populations. Because we were assaying multiple genes, we  
250 applied a Bonferroni correction of ( $\alpha = 0.05/N$ ), where N is the number of assayed genes, as specified in  
251 the table notes.

252 To compare survival among populations, we employed censored Cox Proportional Hazards tests  
253 to estimate variation among populations and to obtain hazard ratios for all populations relative to Snively  
254 *T. confusum* (or MalE, for the RNAi experiment). Pairwise correlations among infection mortality hazard  
255 ratios and immune parameters were quantified using Pearson correlations (rcorr function in R) and  
256 adjusted raw p-values for false discovery rate using the Benjamini-Hochberg method (Benjamini &  
257 Yekutieli 2001). However, it should be noted that since we only had seven populations and since many of  
258 our immune parameters are co-correlated and independently support similar associations, FDR correction  
259 probably inflates Type II error in an overly conservative manner for any given pairwise test.

260

## 261 **Results**

### 262 *Host survival and resistance to bacterial infection vary among populations and species*

263 Survival rates during the acute phase of septic Bt infection differed significantly among beetle  
264 populations (**Fig. 1A, B**). We calculated hazard ratios for each population relative to the Snively *T.*  
265 *confusum* population as it provided maximal differentiation among populations (censored Cox

266 Proportional Hazards, survival ~ site + experimental block, N = 50-60 beetles/population). The other two  
267 *T. confusum* populations did not differ significantly from Snavelly *T. confusum* (Marshall HR = 0.67, p =  
268 0.084, Green River Hazard Ratio = 1.51, p = 0.16), but all four *T. castaneum* populations were  
269 significantly more likely to die (Green River HR = 1.83, p = 0.035; Dorris HR = 2.01, p = 0.017; Snavelly  
270 HR = 2.53, p < 0.001; WF Ware HR = 4.21, p < 0.0001). Sterile saline injections resulted in negligible  
271 mortality (7/140 beetles, or 5%; **Fig. 1A**), which was evenly distributed among different populations.

272 Beetle populations also varied in their resistance to Bt infection, as measured by RT-qPCR at 8  
273 hours post infection with one of four 2-fold increasing doses (N = 6-10 beetles/dose/population). Relative  
274 Bt density at 8 hours post infection differed by 4-5 orders of magnitude for any given initial dose between  
275 the most resistant (Marshall *T. confusum*) and least resistant (Snavelly *T. castaneum*) populations (**Fig.**  
276 **1C**). There was a strong correlation ( $R^2 = 0.91$ , p = 0.0045) between lowest and highest initial doses for  
277 average 8 hour bacterial density among populations. Overall, *T. confusum* populations were significantly  
278 more resistant to Bt than *T. castaneum* populations (Linear model,  $\log(\text{bacterial density}) \sim \text{species} + \text{dose}$ ,  
279 estimate = -1.24, st. error = 1.83, t = 4.7, p < 0.0001), and bacterial load at 8 hours post infection  
280 increased significantly with initial dose (est. = 0.964, st. error = 0.12, t = 8.13, p < 0.0001). Population-  
281 level bacterial density averages at 8 hours post infection (from both low and high initial doses) were  
282 correlated to population survival hazard ratios (dose 1:  $R^2 = 0.72$ , p = 0.071; dose 4:  $R^2 = 0.73$ , p =  
283 0.061), although neither pair-wise correlation was significant.

284 Survival rates against *P. luminescens* were more homogenous among populations (**Fig. S2**),  
285 although Marshall *T. confusum* was once again the least susceptible (50% survival at 24 hours post  
286 infection; N = 50-60 beetles/population). Relative to Marshall, only Green River *T. confusum* was  
287 significantly less likely to survive (HR = 1.93, p = 0.010), although WF Ware *T. castaneum* also did fairly  
288 poorly (HR = 1.58, p = 0.081). Once again, sterile saline injections resulted in negligible mortality (2/55  
289 beetles, or 3.6%).

290 During the first 14 hours after infection, *P. luminscens* bacterial density increased by an average  
291 of 4.5 orders of magnitude, but bacterial density variation among populations (**Fig. S2**) was more  
292 homogenous than observed with Bt. Marshall *T. confusum* was once again among the most resistant  
293 populations, but only Snavelly *T. castaneum* had a significantly higher bacterial load than Marshall  
294 (estimate =  $10^{2.26}$ ,  $t = 2.3$ ,  $p = 0.0284$ ). Average bacterial density at 14 hours post infection was  
295 completely uncorrelated to mortality hazard ratios ( $R^2 = 0.01$ , **Fig. S3**).

### 296 *Inducible immunity is sensitive to microbe density but sensitivity varies by population*

297 To examine variation in constitutive immunity among populations (**Fig. 2A, B**), we quantified the  
298 magnitude of gene expression in individuals that were stabbed with saline but then immediately sacrificed  
299 (within 2 min). All assayed genes exhibited significant variation among populations (ANOVA, *attacin-1*:  
300  $F_{6,80} = 3.22$ ,  $p = 0.0069$ ; *defensin-1*:  $F_{6,80} = 21.05$ ,  $p < 0.0001$ ; *pgrp-sc2*:  $F_{6,80} = 8.155$ ,  $p < 0.0001$ ).  
301 Populations fell roughly into low (significantly different from Snavelly *T. castaneum*) and high expression  
302 bins, where the former includes Snavelly *T. confusum*, Dorris *T. castaneum*, WF Ware *T. castaneum*, and  
303 Marshall *T. confusum*, while the higher expression group includes both *T. castaneum* and *T. confusum*  
304 from Green River (**Table S2, Fig. 2B**).

305 To quantify the magnitude of microbe-independent investment in inducible immunity, we  
306 compared the expression of immune genes 8 hours after induction with a sterile saline jab. For both  
307 *attacin-1* and *defensin-1*, the main effect of population was significant (ANOVA, *att-1*  $F_{6,26} = 3.31$ ,  $p =$   
308  $0.015$ ; *def-1*  $F_{6,26} = 3.655$ ,  $p = 0.0091$ ). Among most populations the range of both *attacin-1* and *defensin-*  
309 *1* expression spanned around 2.5 orders of magnitude, but Marshall exhibited significantly higher  
310 expression of both genes than the other populations (**Table S2**).

311 To quantify microbe density-dependent responses at 8 hours post challenge (combined saline and  
312 Bt-infected;  $N = 20-25$  individuals/population, **Fig. 2C, D**), we employed a linear model of the form:  
313 expression  $\sim$  population + bacterial density + population\*bacterial density. Bt density strongly predicted

314 expression of all assayed genes at 8 hours post infection (**Table 1**). The wild-derived populations varied  
315 significantly in microbe-sensitive expression (Bt density by population interaction) of *attacin-1* (**Fig. 2C**),  
316 *defensin-1* (**Fig. 2D**), and *pgrp-sc2* (**Table 1, Fig. S4**), but not *ddc* (**Fig. S4**;  $F_{6,129} = 1.383$ ,  $p = 0.226$ ).  
317 The Marshall *T. confusum* population stood out as having qualitatively different expression patterns  
318 relative to other populations (**Fig. 2**). The other *T. confusum* populations conformed to general sensitivity  
319 patterns, except that they demonstrated a bimodal distribution of *defensin-1* expression where some  
320 expressed it at high levels at any given microbe density and some expressed it at much lower levels (**Fig.**  
321 **2**).

322 All assayed genes showed significant variation in expression among populations 14 hours after *P.*  
323 *luminescens* infection (**Table 1, Fig. S2**, ANOVA,  $N = 14-16$  individuals/population), and the expression  
324 of all genes was significantly correlated to bacterial density (**Table 1**). However, there was no significant  
325 variation in the sensitivity of gene expression to bacterial density among populations (**Table 1**).

### 326 *Bacterial load and gene expression at time of death varies to some extent by population*

327 As the bacterial load at time of death (BLUD) has been previously proposed as a measure of infection  
328 tolerance in fruit flies (Duneau *et al.* 2017), we sacrificed a subset of beetles from the Bt infection  
329 experiment as soon as they exhibited moribund behavior to quantify bacterial load and gene expression.  
330 Populations showed modest but significant variation in bacterial load at time of death (**Fig. S5A**), which  
331 was not predicted by post-infection time of death (**Table S4, Fig. S5B**). There was substantial variation in  
332 bacterial load at time of death within populations (**Fig. S5A**). Populations differed significantly in  
333 immune gene expression at the time of death (**Table S4**). For example, all *T. confusum* populations  
334 relative to *T. castaneum* had lower expression levels of *defensin-1* at death (**Fig. S5C**), and WF Ware *T.*  
335 *castaneum* exhibited lower expression of the melanization enzyme *ddc* (**Fig. S5D**). Immune gene  
336 expression was still significantly correlated to Bt density (**Table S4**), but the slope was gently negative  
337 (**Fig. S5C, D**), and the population-by-Bt density interaction terms were not significant for any of the  
338 genes (**Table S4**).

339 ***Microbe-independent and -dependent inducible immune parameters are associated with host survival***

340 To uncover associations between infection survival, bacterial resistance, and immune parameters,  
341 we calculated population averages for microbe-independent constitutive and inducible gene expression as  
342 well as inducible sensitivity (the slope of gene expression by Bt density) for *attacin-1*, *defensin-1*, and  
343 *pgrp-sc2*. We performed pairwise Pearson correlation analysis on these parameters against Bt and *P.lum*  
344 survival hazard ratios, Bt density, *P.lum* density, and Bt density at time of death (**Fig. 3A**; circle presence  
345 indicates  $R^2 > 0.75$  and  $p < 0.05$  before FDR correction; none but Bt dose 1 x Bt dose 4 were significant  
346 after FDR correction). While microbe-independent inducible *defensin-1* (and *attacin-1*) magnitude did not  
347 correlate with Bt-induced mortality ( $R^2 = 0.05$ , **Fig. 1B**), it did show a negative correlation with *P.lum*-  
348 induced mortality ( $R^2 = 0.84$ , **Fig. 3C**). On the other hand, the steepness of the microbe-dependent slope  
349 of *defensin-1* induction was positively correlated with Bt-induced mortality ( $R^2 = 0.72$ , **Fig. 3D**) but not  
350 with *P.lum*-induced mortality ( $R^2 = 0.54$ , **Fig. 3E**). The bacterial load at time of death (BLUD) was not  
351 associated with any of the immune parameters, and did not correlate to mortality rates. All pairwise  
352 correlation  $R^2$  values are available in **Fig. S3**.

353 ***Knock-down of imd signaling affects bacterial resistance and inducible immune sensitivity***

354 In the full dose-response experiment (**Fig. 4**), RNAi-mediated knock-down of *imd* expression (4-  
355 fold reduction relative to MalE-injected individuals) in Snavely *T. castaneum* did not significantly affect  
356 bacterial density in infected individuals even as dose was a highly significant predictor of Bt density  
357 (linear model, IMD vs. MalE, effect of treatment: estimate = 10.7, st. error = 0.78,  $t = 1.322$ ,  $p = 0.191$ ;  
358 effect of dose: estimate = 2.44, st. error = 0.26,  $t = 9.19$ ,  $p < 0.00001$ ). However, we noticed that bacterial  
359 density followed a non-continuous distribution of low and high groups within and among doses (**Fig. 4C**)  
360 consistent with bifurcating infection outcomes ((Duneau *et al.* 2017) and complicating statistical  
361 interpretation. Therefore, we performed another infection experiment with a lower dose and earlier  
362 sampling to avoid the bimodal distribution (**Fig. 4B**), and in this experiment IMD-RNAi individuals had a  
363 significantly higher bacterial load than MalE-RNAi individuals (linear model, estimate = 18-fold increase

364 in Bt density, st. error = 1.88,  $t = 4.556$ ,  $p = 0.000378$ ). Despite the exacerbation of bacterial density in  
365 IMD-RNAi individuals, this group was not more likely to die during the acute infection phase relative to  
366 MalE-RNAi individuals (**Fig. 4A**, Cox Proportional Hazards,  $N = 50/\text{treatment}$ , hazard ratio = 1.05,  $Z =$   
367 0.174,  $p = 0.86$ ).

368 In the full dose-response experiment (**Fig. 4D**; ANOVAs in **Table 1**), the knockdown of *imd*  
369 significantly reduced the mean magnitude of *attacin-1* and *defensin-1* expression after Bt infection. IMD  
370 knock-down also significantly reduced the sensitivity of *defensin-1* expression to Bt density (RNAi  
371 treatment x Bt density interaction) without negating the main effect of Bt density on gene expression.

## 372 **Discussion**

373 The parasites to which hosts are exposed, the frequency of exposure, and the costs and benefits  
374 associated with mounting defenses against those parasites, are all expected to contribute to the evolution  
375 of inducible immune responses (Cressler *et al.* 2015; Frank 2002; Hamilton *et al.* 2008; Mayer *et al.*  
376 2016). The dynamics of immunity during the acute infection phase are particularly important for host  
377 fitness, as modest levels of variation in early responses could lead to drastic variation in host mortality  
378 and parasite persistence (Duneau *et al.* 2017). However, the ecological, microbial, and temporal factors to  
379 which these dynamics are sensitive have not been well-established, providing few avenues to quantify and  
380 understand natural variation in inducible immune responses. Recent experiments have suggested that  
381 immune effector expression in insects might indeed be sensitive to microbe density (Louie *et al.* 2016;  
382 Tate & Graham 2017), raising a host of new questions surrounding the dynamics of inducible immune  
383 responses. In this study, we discovered substantial variation in both microbe-dependent and independent  
384 inducible immune dynamics among flour beetle populations during acute infection with Bt, suggesting  
385 evolutionary maintenance of variation in both traits. The average magnitude of microbe-independent  
386 inducible immunity at the population level was positively associated with survival against *P. luminescens*,  
387 a slow-growing but virulent bacterium that inhibits host inducible responses (Hwang *et al.* 2013). On the  
388 other hand, the slope of microbe-sensitive inducible *defensin-1* expression was associated with poor



389 survival outcomes against Bt. As expected, interfering with inducible immune signaling via RNAi-  
390 mediated knockdown of *imd* reduced the magnitude of microbe-independent inducible immune gene  
391 expression, but for *defensin-1* it also affected microbe-dependent sensitivity. This study provides the first  
392 evidence, to our knowledge, of natural variation in these facets of inducible immune dynamics and  
393 suggests that these dynamics may be associated with different costs and benefits when confronted with  
394 microbes that vary in antigenic and pathogenic life history traits.

### 395 ***The costs and benefits of immunological sensitivity to microbe density***

396 Literature from as far back as the 1950s testifies to the diversity of bacteria, (Burgess & Weiser  
397 1973), protozoa (Park & Marian Burton 1950), microsporidia (Milner 1972), fungi (Burgess & Weiser  
398 1973), and helminths (Yan *et al.* 1998) with which flour beetles are naturally infected. Given that  
399 different populations probably face evolutionary pressures from different subsets of these parasites, it is  
400 not surprising that our seven populations demonstrated substantial natural variation in immune system  
401 activation, resistance, and survival outcomes against two focal microbes.

402 From an evolutionary perspective, should we expect greater variation in microbe-independent  
403 responses than in microbe-sensitive ones? An on/off binary response to microbial exposure should be  
404 associated with the same kinds of energetic and immunopathological sunk costs that we traditionally  
405 associate with constitutive immunity, while a response that is able to respond dynamically to changes in  
406 microbe density would allow greater flexibility to pay costs only when needed, as well as maintain  
407 populations of commensals or beneficial microbes. However, the latter strategy risks losing control over  
408 fast-growing microbes. Optimal investment in microbe-independent and sensitive inducible dynamics is  
409 also likely to depend on the frequency and predictability of parasite exposure, complementing predictions  
410 made for optimal investment in constitutive and inducible immunity (Hamilton *et al.* 2008; Mayer *et al.*  
411 2016). Finally, epidemiological feedbacks in populations with different immune strategy distributions  
412 should lead to different pressures on transmission and virulence (Cressler *et al.* 2015), further creating an  
413 opportunity for natural variation in both microbe dependent and independent terms.

414 In this study, we focused on two AMPs that are sensitive to microbe density in *T. castaneum*  
415 (Tate & Graham 2017). Previous work has established that the AMP *attacin-1* is regulated by the IMD  
416 pathway in *T. castaneum* (Yokoi *et al.* 2012a). The AMP *defensin-1* is also regulated by IMD signaling,  
417 but is additionally co-regulated by the Toll pathway and other tissue-dependent mechanisms (Tzou *et al.*  
418 2000; Yokoi *et al.* 2012b). Thus, while both are sensitive to microbe density and thus correlated (**Fig. S1**;  
419 (Tate & Graham 2017)), we did not expect them to be entirely co-regulated. In our study, two *T.*  
420 *confusum* populations (Snively and Marshall) that showed heightened survival against Bt relative to other  
421 populations (**Fig. 1A, B**) also showed lower *defensin-1* sensitivity to microbe density (**Fig. 2D**), echoing a  
422 broader association between mortality and *defensin-1* sensitivity among our populations (**Fig. 3D**).

423 This does not imply that *defensin-1* is somehow intensely immunopathological and contributing  
424 causally to mortality. Instead, we suspect that *defensin-1* sensitivity may simply covary with a suite of  
425 stress responses that indicate failure to control infections, including high damage signals, oxidative stress,  
426 and general pathology. Supporting this idea, knocking down *imd* reduces *defensin-1* expression by around  
427 three orders of magnitude at the highest bacterial densities (**Fig. 4D**), reduces sensitivity, and reduces  
428 resistance by at least one order of magnitude (**Fig. 4B, C**) but does not ultimately impact survival or even  
429 the distribution of time to death in insects inoculated with an LD50 dose of Bt (**Fig. 4A**). It may be that  
430 IMD pathway-mediated immunopathology is equivalent to approximately one order of magnitude of  
431 bacterial virulence per unit time, thus producing no net effect on host survival. It is more likely, however,  
432 that survival against Bt is determined long before the inducible immune response becomes relevant,  
433 relying instead on variation in alternative arms of the immune system like melanization or phagocytosis to  
434 create differences in Bt-induced mortality rates among individuals and populations (Duneau *et al.* 2017).  
435 Finally, AMP expression was sensitive to *P. luminescens* density, but there was very little variation in  
436 sensitivity among populations just as there was negligible variation in resistance and mortality rates (**Fig.**  
437 **S1**). Thus, we propose that the microbe-dependent inducible immune gene expression parameter may be a  
438 quantifiable marker of overall infection pathology and virulence.

439           On the other hand, the microbe-independent inducible immune parameter may be functionally  
440 relevant against slower-growing but manipulative microbes, as the average expression of both *attacin-1*  
441 and *defensin-1* at 8 hours post saline-stab was associated with slower mortality rates during *P.*  
442 *luminescens* infection (**Fig. 3A, C**). This is not particularly surprising, since the bacterium goes through  
443 the trouble of suppressing AMPs in its native lepidopteran hosts (Nielsen-LeRoux *et al.* 2012) and thus  
444 AMPs must present at least some threat to the bacterium. Earlier and stronger expression of AMPs before  
445 bacteria reach high densities could help delay bacterial growth and the onset of density-dependent  
446 virulence factor production through quorum-sensing, a hallmark of *Photobacterium* and Bt life history  
447 strategies (Nielsen-LeRoux *et al.* 2012).

#### 448 ***Bacterial load at time of death and its association with infection tolerance***

449           The bacterial load at time of death (BLUD) has been proposed as a metric of infection tolerance  
450 (Duneau *et al.* 2017) since it should take more bacteria to kill a more tolerant host, all other things being  
451 equal. For example, the average BLUD of *D. melanogaster* adults is lower upon infection with more  
452 virulent bacteria relative to less virulent bacteria, and is independent of the time to death (Duneau *et al.*  
453 2017). In our study, the BLUD of larval *Tribolium* beetles was also uncorrelated to time of death after  
454 infection with Bt (**Fig. S5B**). However, there was substantially more variation in BLUD among  
455 individuals within populations than there was among populations (**Fig. S5A**), and average BLUD was not  
456 associated with any survival metrics at the population level (**Fig. S2A**), clouding its utility as a proxy of  
457 infection tolerance. Whether variation in BLUD reflects variation in factors associated with tolerance,  
458 such as damage repair, energetic provisioning, or immunopathology (Ayres & Schneider 2012), still  
459 requires further study in this and other species.

460           It is worth noting that AMP expression sensitivity to bacterial load in moribund individuals was  
461 dampened or even slightly negative (**Fig. S5C**), and while sensitivity did not significantly differ among  
462 populations, the overall magnitude of *defensin-1* expression at time of death was lower in *T. confusum*  
463 populations relative to *T. castaneum* (**Fig. S5C**). Louie *et al.* (Louie *et al.* 2016) found that different

464 AMPs show different sensitivities to *Listeria monocytogenes* density in fruit flies recovering with the aid  
465 of antibiotics, and that unlike our acute infection phase data, the sensitivity relationship had a decidedly  
466 sigmoidal shape that included a maximal expression level. Collected well prior to the onset of host  
467 mortality for both bacterial species, our acute phase data likely reflect the linear portion of the sensitivity  
468 curve, but at the time of death individuals may have hit the flat maximum of the sigmoid. Our data  
469 suggest that the intercept and linear slope of this curve are likely to be relevant for infection outcomes;  
470 whether the maximum expression level has functional consequences for host survival or microbial  
471 transmission represents an avenue for future study.

#### 472 ***Future directions***

473 Our observation that *T. confusum* populations are more likely to survive Bt infection than *T.*  
474 *castaneum* populations echoes a classic observation of heightened resistance to coccidian infection in *T.*  
475 *confusum* relative to *T. castaneum* that modulated competitive dynamics among the two host species  
476 (Park & Marian Burton 1950). As these species co-occur in many temperate regions, including two sites  
477 (Green River and Snively) that we sampled for this study, it would be interesting to determine the extent  
478 to which variation in microbial sensitivity arises through local adaptation as opposed to species-level  
479 variation in immune system architecture, and to what extent inducible immune variation could influence  
480 competition and coexistence among host species in communities that share parasites.

481 The mechanisms that control microbe density-dependent sensitivity remain unclear. Knock-down  
482 of *imd* expression using RNAi reduced the mean expression of *attacin-1* and *defensin-1* during Bt  
483 infection by over three orders of magnitude but only affected the sensitivity of *defensin-1* (**Table 1**). It is  
484 possible that targeting recognition protein abundance or the affinity of transcription factors for AMP-  
485 specific promoter regions might produce variation in the sensitivity of AMP expression to microbe  
486 density, and thus represent avenues for future manipulation. It is also possible that sensitivity is driven by  
487 spatial considerations, for example the rate of bacterial dissemination throughout the hemocoel, but it is  
488 not clear why this would differ among species and populations. Uncovering the mechanism(s) regulating

489 inducible sensitivity to microbe density, coupled with experimental evolution of sensitivity, would allow  
490 the estimation of the relative costs and benefits of microbe density-dependent and independent inducible  
491 immune responses.

## 492 **Conclusions**

493 In this study, we have demonstrated that flour beetle populations exhibit variation in both  
494 microbe density-dependent and –independent inducible immune parameters, and that the relative costs  
495 and benefits of investment in inducible immunity are relevant for understanding infection outcomes in a  
496 world where hosts are assailed by a diversity of unpredictable parasites. We recommend that theoretical  
497 studies on immune system evolution or host-microbe coevolution consider these results when building  
498 models and parameterizing the associated fitness costs of immunity. In a similar vein, eco-immunologists  
499 should consider multiple immunological parameters when designing experiments to disentangle  
500 relationships between infection, the magnitude of immunological investment, and host fitness.

## 501 **Acknowledgements**

502 We would like to thank Jeff Demuth for providing *T. confusum* gene sequences and Allison Leich-Hilbun  
503 for comments on the draft.

## 504 **References**

- 505 Ardia DR, Gantz JE, Brent C, Schneider, Strebel S (2012) Costs of immunity in insects: an induced  
506 immune response increases metabolic rate and decreases antimicrobial activity. *Functional*  
507 *Ecology* **26**, 732-739.
- 508 Ayres JS, Schneider DS (2012) Tolerance of Infections. *Annual Review of Immunology* **30**, 271-294.
- 509 Bajgar A, Kucerova K, Jonatova L, *et al.* (2015) Extracellular Adenosine Mediates a Systemic Metabolic  
510 Switch during Immune Response. *PLoS Biol* **13**, e1002135.
- 511 Benjamini Y, Yekutieli D (2001) The Control of the False Discovery Rate in Multiple Testing under  
512 Dependency. *The Annals of Statistics* **29**, 1165-1188.
- 513 Burges HD, Weiser J (1973) Occurrence of pathogens of the flour beetle, *Tribolium castaneum*. *Journal*  
514 *of Invertebrate Pathology* **22**, 464-466.
- 515 Ciche TA, Ensign JC (2003) For the insect pathogen *Photorhabdus luminescens*, which end of a nematode  
516 is out? *Appl. Environ. Microbiol.* **69**, 1890-1897.
- 517 Cressler CE, Graham AL, Day T (2015) Evolution of hosts paying manifold costs of defence.  
518 *Proceedings of the Royal Society of London B: Biological Sciences* **282**.
- 519 Dejnirattisai W, Jumnainsong A, Onsirirakul N, *et al.* (2010) Cross-Reacting Antibodies Enhance Dengue  
520 Virus Infection in Humans. *Science* **328**, 745-748.

- 521 Dönitz J, Schmitt-Engel C, Grossmann D, *et al.* (2014) iBeetle-Base: a database for RNAi phenotypes in  
522 the red flour beetle *Tribolium castaneum*. *Nucleic Acids Research*, gku1054.
- 523 Duneau D, Ferdy J-B, Revah J, *et al.* (2017) Stochastic variation in the initial phase of bacterial infection  
524 predicts the probability of survival in *D. melanogaster*. *Elife* **6**, e28298.
- 525 Frank SA (2002) Immune Response to Parasitic Attack: Evolution of a Pulsed Character. *Journal of*  
526 *Theoretical Biology* **219**, 281-290.
- 527 Gupta V, Vale PF (2017) Nonlinear disease tolerance curves reveal distinct components of host responses  
528 to viral infection. *Royal Society open science* **4**, 170342.
- 529 Hamilton R, Siva-Jothy M, Boots M (2008) Two arms are better than one: parasite variation leads to  
530 combined inducible and constitutive innate immune responses. *Proceedings of the Royal Society*  
531 *B: Biological Sciences* **275**, 937-945.
- 532 Huang CY, Chou SY, Bartholomay LC, Christensen BM, Chen CC (2005) The use of gene silencing to  
533 study the role of dopa decarboxylase in mosquito melanization reactions. *Insect Molecular*  
534 *Biology* **14**, 237-244.
- 535 Hwang J, Park Y, Kim Y, Hwang J, Lee D (2013) An entomopathogenic bacterium, *Xenorhabdus*  
536 *nematophila*, suppresses expression of antimicrobial peptides controlled by Toll and IMD  
537 pathways by blocking eicosanoid biosynthesis. *Archives of Insect Biochemistry and Physiology*  
538 **83**, 151-169.
- 539 Koyama H, Kato D, Minakuchi C, *et al.* (2015) Peptidoglycan recognition protein genes and their roles in  
540 the innate immune pathways of the red flour beetle, *Tribolium castaneum*. *Journal of Invertebrate*  
541 *Pathology* **132**, 86-100.
- 542 Login FH, Balmand S, Vallier A, *et al.* (2011) Antimicrobial Peptides Keep Insect Endosymbionts Under  
543 Control. *Science* **334**, 362-365.
- 544 Lord JC, Hartzer K, Toutges M, Oppert B (2010) Evaluation of quantitative PCR reference genes for gene  
545 expression studies in *Tribolium castaneum* after fungal challenge. *Journal of Microbiological*  
546 *Methods* **80**, 219-221.
- 547 Louie A, Song KH, Hotson A, Thomas Tate A, Schneider DS (2016) How Many Parameters Does It Take  
548 to Describe Disease Tolerance? *PLoS Biol* **14**, e1002435.
- 549 Mayer A, Mora T, Rivoire O, Walczak AM (2016) Diversity of immune strategies explained by  
550 adaptation to pathogen statistics. *Proceedings of the National Academy of Sciences* **113**, 8630-  
551 8635.
- 552 Milner RJ (1972) *Nosema whitei*, a microsporidan pathogen of some species of *Tribolium*. *Journal of*  
553 *Invertebrate Pathology* **19**, 231-238.
- 554 Murphy L, Pathak AK, Cattadori IM (2013) A co-infection with two gastrointestinal nematodes alters  
555 host immune responses and only partially parasite dynamics. *Parasite Immunology* **35**, 421-432.
- 556 Nielsen-LeRoux C, Gaudriault S, Ramarao N, Lereclus D, Givaudan A (2012) How the insect pathogen  
557 bacteria *Bacillus thuringiensis* and *Xenorhabdus/Photorhabdus* occupy their hosts. *Current*  
558 *Opinion in Microbiology* **15**, 220-231.
- 559 Park T, Marian Burton F (1950) The population history of *Tribolium* free of sporozoan infection. *Journal*  
560 *of Animal Ecology* **19**, 95-105.
- 561 Jent D., Perry A., Critchlow J., Tate, A.T. Data from: Natural variation in the contribution of microbial  
562 density to inducible immune dynamics. Dryad Data Repository DOI: XXXX
- 563 Posnien N, Schinko J, Grossmann D, *et al.* (2009) RNAi in the Red Flour Beetle (*Tribolium*). *Cold*  
564 *Spring Harb Protoc* **2009**, pdb.prot5256-.
- 565 Raymond B, Johnston PR, Nielsen-LeRoux C, Lereclus D, Crickmore N (2010) *Bacillus thuringiensis*: an  
566 impotent pathogen? *Trends in Microbiology* **18**, 189-194.
- 567 Sadd BM, Siva-Jothy MT (2006) Self-harm caused by an insect's innate immunity. *Proceedings of the*  
568 *Royal Society B: Biological Sciences* **273**, 2571-2574.
- 569 Shudo EMI, Iwasa YOH (2001) Inducible Defense against Pathogens and Parasites: Optimal Choice  
570 among Multiple Options. *Journal of Theoretical Biology* **209**, 233-247.

- 571 Tate AT, Andolfatto P, Demuth JP, Graham AL (2017) The within-host dynamics of infection in trans-  
572 generationally primed flour beetles. *Molecular Ecology* **26**, 3794–3807.
- 573 Tate AT, Graham AL (2015a) Dynamic Patterns of Parasitism and Immunity across Host Development  
574 Influence Optimal Strategies of Resource Allocation. *The American Naturalist* **186**, 495-512.
- 575 Tate AT, Graham AL (2015b) Trans-generational priming of resistance in wild flour beetles reflects the  
576 primed phenotypes of laboratory populations and is inhibited by co-infection with a common  
577 parasite. *Functional Ecology* **29**, 1059-1069.
- 578 Tate AT, Graham AL (2017) Dissecting the contributions of time and microbe density to variation in  
579 immune gene expression. *Proceedings of the Royal Society B: Biological Sciences* **284**.
- 580 Tzou P, Ohresser S, Ferrandon D, *et al.* (2000) Tissue-Specific Inducible Expression of Antimicrobial  
581 Peptide Genes in Drosophila Surface Epithelia. *Immunity* **13**, 737-748.
- 582 Ezenwa, V.O Rampal S. Etienne, Gordon Luikart, Albano Beja-Pereira, Anna E. Jolles (2010) Hidden  
583 Consequences of Living in a Wormy World: Nematode-Induced Immune Suppression Facilitates  
584 Tuberculosis Invasion in African Buffalo. *The American Naturalist* **176**, 613-624.
- 585 Westra Edze R, van Houte S, Oyesiku-Blakemore S, *et al.* (2015) Parasite Exposure Drives Selective  
586 Evolution of Constitutive versus Inducible Defense. *Current Biology* **25**, 1043-1049.
- 587 Yan G, Stevens L, Goodnight CJ, Schall JJ (1998) Effects of a tapeworm parasite on the competition of  
588 Tribolium beetles. *Ecology (Washington D C)* **79**, 1093-1103.
- 589 Yokoi K, Koyama H, Ito W, *et al.* (2012a) Involvement of NF- $\kappa$ B transcription factors in antimicrobial  
590 peptide gene induction in the red flour beetle, *Tribolium castaneum*. *Developmental &*  
591 *Comparative Immunology* **38**, 342-351.
- 592 Yokoi K, Koyama H, Minakuchi C, Tanaka T, Miura K (2012b) Antimicrobial peptide gene induction,  
593 involvement of Toll and IMD pathways and defense against bacteria in the red flour beetle,  
594 *Tribolium castaneum*. *Results in Immunology* **2**, 72-82.

#### 595 **Data Accessibility**

596 The RT-qPCR data and metadata will be deposited into Data Dryad upon manuscript acceptance.

#### 597 **Author Contributions**

598 A.T.T. conceived the study, A.T.T., D.G., A.P, J.C. designed the experiments, D.G., A.P., J.C, A.T.T.  
599 performed the experiments, A.T.T., A.P., J.C., D.G. analyzed the data, and A.T.T. wrote the manuscript  
600 with input from all authors.

601

602

603

604

605

606

607

608

609

610

611 **Tables**

**Table 1.** Immune gene expression sensitivity to bacterial density, population, and their interaction

| <b>Gene</b>                                              | <b>Factor</b>  | <b>Df</b> | <b>Sum Sq</b> | <b>Mean Sq</b> | <b>Fval</b> | <b>P val</b>     |
|----------------------------------------------------------|----------------|-----------|---------------|----------------|-------------|------------------|
| <b><i>Bacillus thuringiensis</i> (Bt) infection</b>      |                |           |               |                |             |                  |
| <i>attacin-1</i>                                         | Population     | 6         | 155.0         | 25.8           | 15.7        | <b>1.9E-13</b>   |
|                                                          | Bt density     | 1         | 154.8         | 154.8          | 94.0        | <b>&lt;2e-16</b> |
|                                                          | Pop*Bt         | 6         | 36.4          | 6.1            | 3.7         | <b>0.0021</b>    |
|                                                          | Residuals      | 129       | 212.5         | 1.7            |             |                  |
| <i>defensin-1</i>                                        | Population     | 6         | 334.5         | 55.8           | 16.8        | <b>2.90E-14</b>  |
|                                                          | Bt density     | 1         | 33            | 33.1           | 10.0        | <b>0.0020</b>    |
|                                                          | Pop*Bt         | 6         | 63.5          | 10.6           | 3.2         | <b>0.0060</b>    |
|                                                          | Residuals      | 129       | 428           | 3.3            |             |                  |
| <i>pgrp-sc2</i>                                          | Population     | 6         | 307.7         | 51.3           | 26.3        | <b>&lt;2e-16</b> |
|                                                          | Bt density     | 1         | 30.5          | 30.5           | 15.6        | <b>0.00013</b>   |
|                                                          | Pop*Bt         | 6         | 39.2          | 6.5            | 3.3         | <b>0.0043</b>    |
|                                                          | Residuals      | 129       | 252           | 1.95           |             |                  |
| <b><i>Photorhabdus luminescens</i> (Plum) infection</b>  |                |           |               |                |             |                  |
| <i>attacin-1</i>                                         | Population     | 6         | 103.4         | 17.2           | 2.4         | 0.036            |
|                                                          | Plum density   | 1         | 479.9         | 479.9          | 66.6        | <b>4.6E-12</b>   |
|                                                          | Pop*Plum       | 6         | 39.9          | 6.7            | 0.92        | 0.48             |
|                                                          | Residuals      | 78        | 562.4         | 7.2            |             |                  |
| <i>defensin-1</i>                                        | Population     | 6         | 334.3         | 55.7           | 8.0         | <b>9.8E-07</b>   |
|                                                          | Plum density   | 1         | 356.8         | 356.8          | 51.2        | <b>4.0E-10</b>   |
|                                                          | Pop*Plum       | 6         | 41.5          | 6.9            | 0.99        | 0.44             |
|                                                          | Residuals      | 78        | 543.3         | 7              |             |                  |
| <i>pgrp-sc2</i>                                          | Population     | 6         | 71.9          | 12.0           | 3.1         | <b>0.0088</b>    |
|                                                          | Plum density   | 1         | 172.2         | 172.2          | 44.7        | <b>3.1E-09</b>   |
|                                                          | Pop*Plum       | 6         | 26.7          | 4.5            | 1.2         | 0.33944          |
|                                                          | Residuals      | 78        | 300.4         | 3.9            |             |                  |
| <b>Bt infection + RNAi (Snavely <i>T. castaneum</i>)</b> |                |           |               |                |             |                  |
| <i>attacin-1</i>                                         | RNAi treatment | 1         | 49.9          | 49.9           | 19.6        | <b>4.4E-05</b>   |
|                                                          | Bt density     | 1         | 534.6         | 534.6          | 210.0       | <b>&lt;2e-16</b> |
|                                                          | RNAi*Bt        | 1         | 13.8          | 13.8           | 5.4         | 0.0233           |
|                                                          | Residuals      | 57        | 145.1         | 2.5            |             |                  |
| <i>defensin-1</i>                                        | RNAi treatment | 1         | 59.9          | 59.9           | 51.2        | <b>1.8E-09</b>   |
|                                                          | Bt density     | 1         | 100.4         | 100.4          | 85.8        | <b>5.8E-13</b>   |
|                                                          | RNAi*Bt        | 1         | 14.4          | 14.37          | 12.3        | <b>9.0E-04</b>   |
|                                                          | Residuals      | 57        | 66.7          | 1.17           |             |                  |
| <i>pgrp-sc2</i>                                          | RNAi treatment | 1         | 15.9          | 15.9           | 19.8        | <b>4.1E-05</b>   |
|                                                          | Bt density     | 1         | 104.8         | 104.8          | 130.1       | <b>2.4E-16</b>   |
|                                                          | RNAi*Bt        | 1         | 2.17          | 2.17           | 2.7         | 0.11             |
|                                                          | Residuals      | 57        | 45.9          | 0.81           |             |                  |
| <i>cecropin-3</i>                                        | RNAi treatment | 1         | 2.53          | 2.53           | 1.50        | 0.23             |
|                                                          | Bt density     | 1         | 1.82          | 1.82           | 1.07        | 0.31             |
|                                                          | RNAi*Bt        | 1         | 0.16          | 0.16           | 0.095       | 0.76             |
|                                                          | Residuals      | 57        | 96.4          | 1.69           |             |                  |

Notes: Multifactorial ANOVAs were conducted on each gene using the "aov" function in R using the expression: gene expression ~ factor + bact density + factor\*bact density, where 'factor' is either population or RNAi treatment (MaE, IMD). P values less than the significance threshold after correcting for multiple testing (Bonferroni method; alpha = 0.0125) are in bold.



613 **Supplemental Tables** (Separate File)

614 **Table S1:** Primer sequences used in study

615 **Table S2:** Gene expression in naïve and saline-stabbed beetle populations

616 **Table S3:** Population hazard ratios and gene expression means for naïve, saline-injected, and bacteria-  
617 infected individuals used in correlation plots

618 **Table S4:** Bacterial load at time of death, correlations with immune gene expression, and population  
619 variation

620

621 **Figures**

622 **Figure 1.** Natural variation in survival and bacterial density during Bt infection. Survival during acute  
623 infection with dose “2” was monitored for at least 20 hours post infection in one of two experimental  
624 blocks (**A, B**; N = 50-60 beetles/population). To quantify variation in bacterial density, flour beetles were  
625 given 2-fold increasing initial doses of Bt (1, 2, 4, 8) and sacrificed 8 hours later. Relative bacterial  
626 density for each individual within each population and dose, as quantified by RT-qPCR, is calculated as  
627 the log of the linearized difference between Bt-specific and host reference gene expression (**C**). Linear  
628 regression lines are provided to visualize increasing bacterial density at 8 hours post infection by initial  
629 dose. Populations are color-coded; *T. castaneum* (T) populations have dashed lines and *T. confusum* (F)  
630 populations have solid lines.

631 **Figure 2.** Patterns of constitutive and inducible *attacin-1* and *defensin-1* expression by population. As  
632 quantified by RT-qPCR, the log of relative immune gene expression prior to infection varied among naïve  
633 individuals from each population (*attacin-1*, **A.**; *defensin-1*, **B.**) Black lines indicate median values for  
634 each population. The relationship between the log of bacterial density and the log of *attacin-1* (**C.**) and  
635 *defensin-1* (**D.**) gene expression 8 hours after challenge with saline or Bt infection illustrates variation in  
636 both the intercept (microbe-independent) and slope (microbe-dependent sensitivity) of inducible immune  
637 gene expression among populations. Lines represent linear fits for each main variable level as computed  
638 by the “lm” function in the geom\_smooth algorithm of ggplot2 (R).

639 **Figure 3.** Correlations between constitutive and inducible immune parameters and phenotypic outcomes  
640 of infection with *Bacillus thuringiensis* and *Photorhabdus luminescens*. Quantification of Pearson  
641 correlation coefficients (significant pairwise correlations, **A**) identified no relationship between the  
642 microbe-independent inducible intercept of *defensin-1* expression and Bt mortality (**B**, as quantified by  
643 population Hazard Ratios), but a significant negative relationship between *defensin-1* intercept and  
644 mortality from *P. luminescens* infection (**C**). On the other hand, the microbe-dependent slope coefficient  
645 of *defensin-1* expression was significantly correlated to Bt-induced mortality (**D**), with a positive but non-  
646 significant association with *P. luminescens* mortality (**E**) as well. HR = hazard ratio, BLUD = Bt density  
647 at death, Bt\_dose and Plum\_dens = bacterial density at 8 and 14 hours post infection respectively, naïve =  
648 expression in uninfected individuals, int = microbe-independent inducible gene expression intercept  
649 (saline-injected expression at 8 hours), coef = slope of expression over bacterial density. Att1 = *attacin-1*,  
650 Def1 = *defensin-1*, pg = *pgrp-sc2*, ddc = *dopa decarboxylase*. Lines represent linear fits for each main  
651 variable level as computed by the “lm” function in the geom\_smooth algorithm of ggplot2 (R).

652 **Figure 4.** RNAi-mediated knockdown of *imd*, a regulatory element of the IMD pathway, impacts  
653 bacterial density and inducible immune parameters but not survival against Bt infection. Snavely *T.*

654 *castaneum* individuals were injected with dsRNA against the *imd* gene (IMD, yellow), or a no-target  
655 dsRNA injection control (MalE, blue). Individuals were injected with an LD50 dose of Bt and the  
656 proportion surviving was monitored for 24 hours (A). Individuals were administered a low dose (B) or  
657 increasing doses (C) of Bt, and relative bacterial density was quantified via RT-qPCR at 8 hours post  
658 infection. Black dots represent the median bacterial density for each group. These same individuals (as  
659 well as saline controls) were also assayed for expression of *defensin-1* relative to bacterial density (D) to  
660 quantify the impact of the *imd* pathway on microbe independent and dependent inducible immune  
661 responses. Lines represent linear fits for each main variable level as computed by the “lm” function in the  
662 geom\_smooth algorithm of ggplot2 (R).

663

## 664 **Supplemental Figures**

665 **Figure S1.** Correlations in the relative expression levels of immune genes and bacterial density for host  
666 species, by site.

667 **Figure S2.** Survival, resistance, and immune gene expression of natural populations during *Photorhabdus*  
668 *luminescens* infection.

669 **Figure S3.** Correlations between constitutive and inducible immune parameters and phenotypic outcomes  
670 of infection with *Bacillus thuringiensis* and *Photorhabdus luminescens*.

671 **Figure S4.** Patterns of constitutive and inducible immune gene expression.

672 **Figure S5.** Bacterial density and immune gene expression at the time of infection-induced mortality with  
673 Bt.

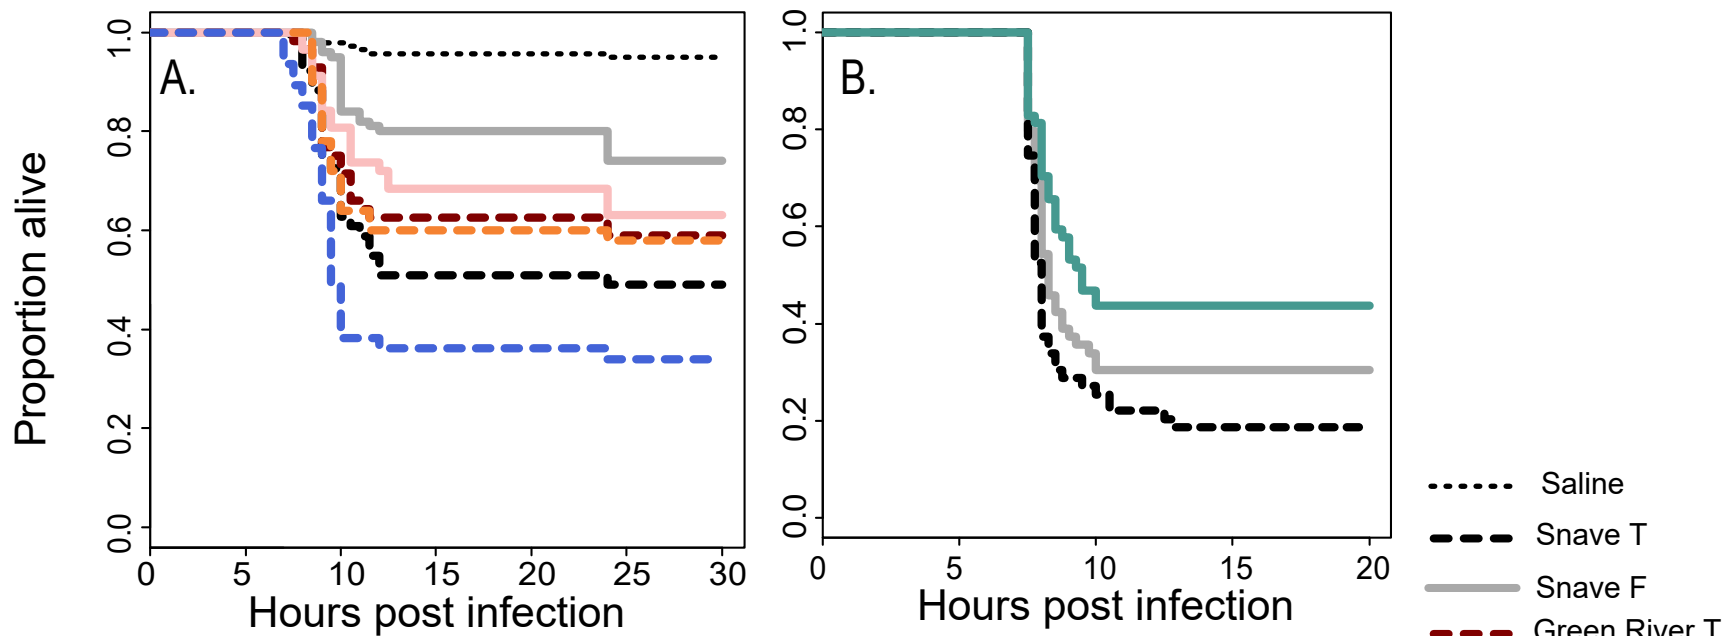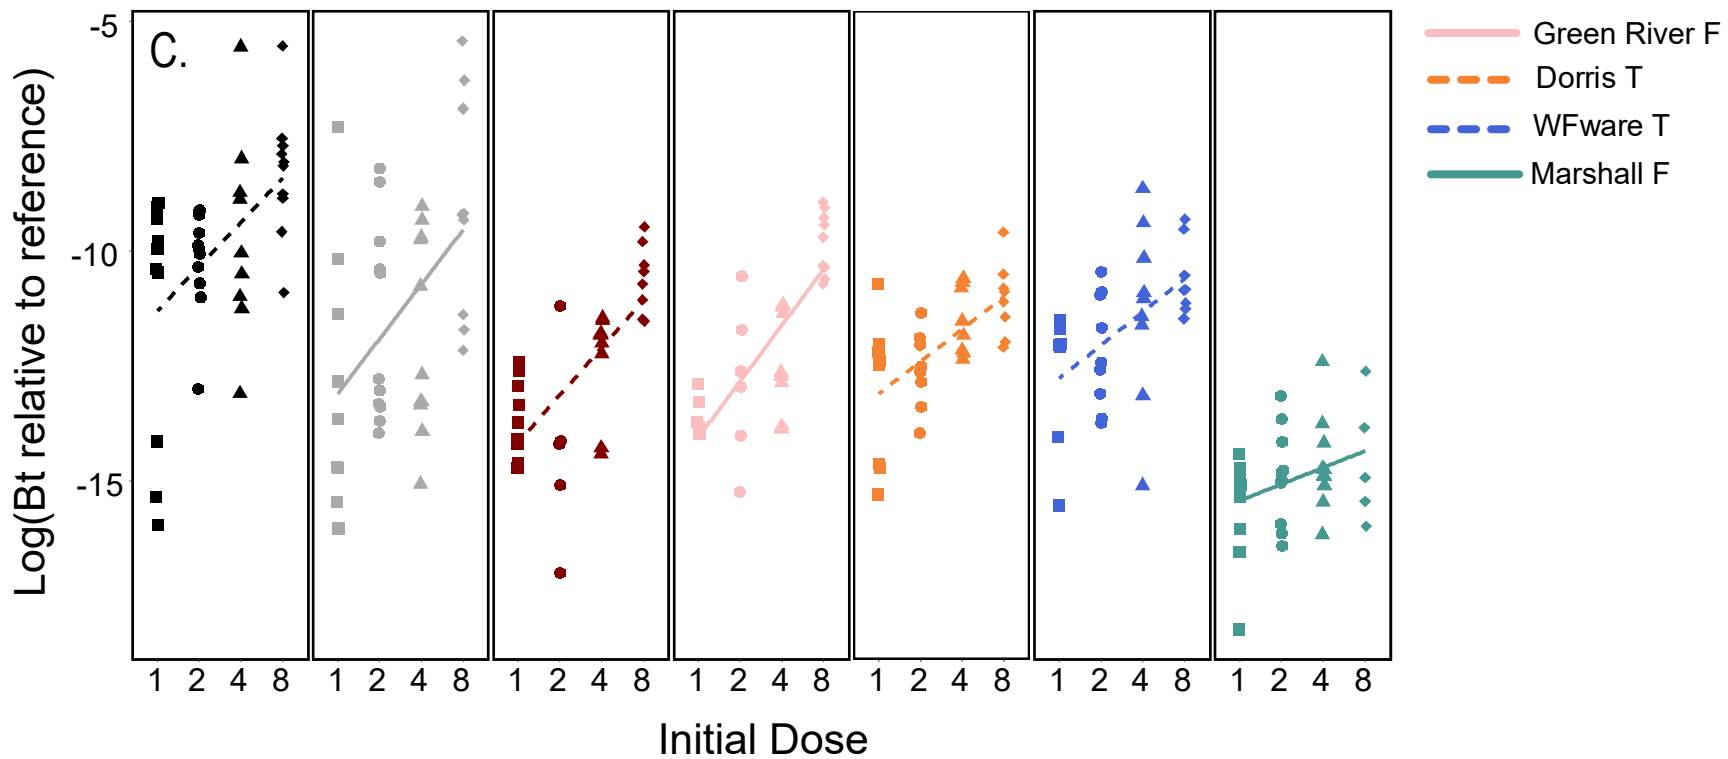

**Attacin-1****Constitutive**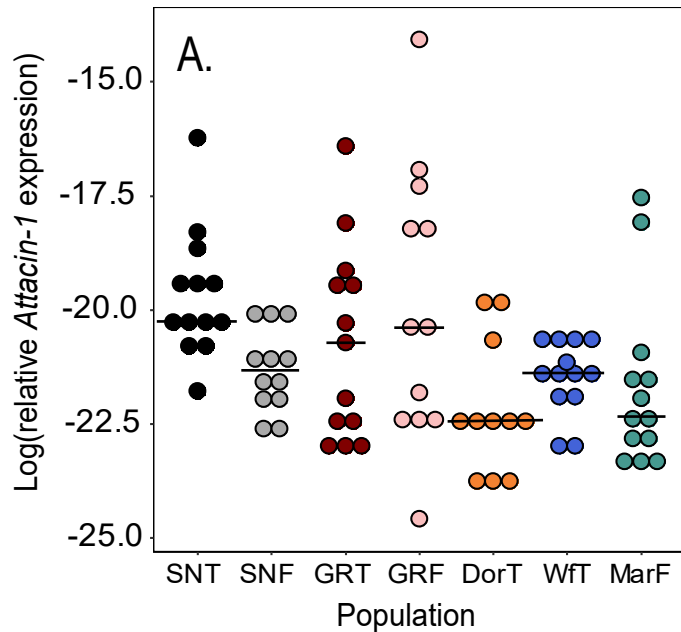**Defensin-1****Constitutive**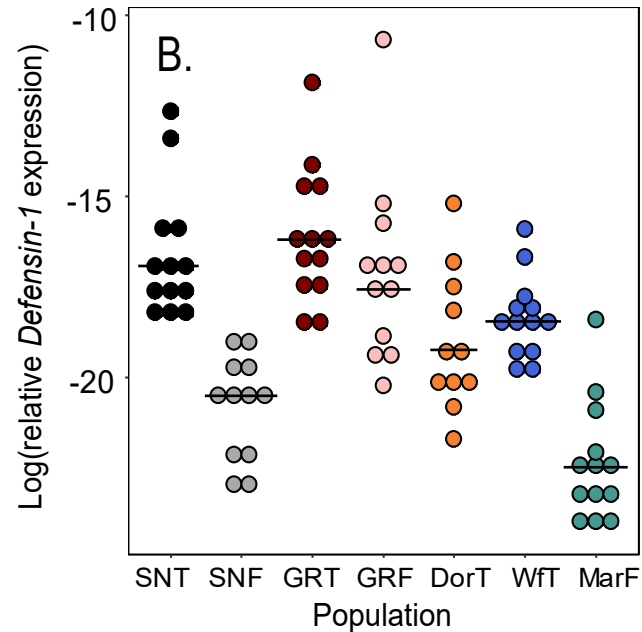**Inducible**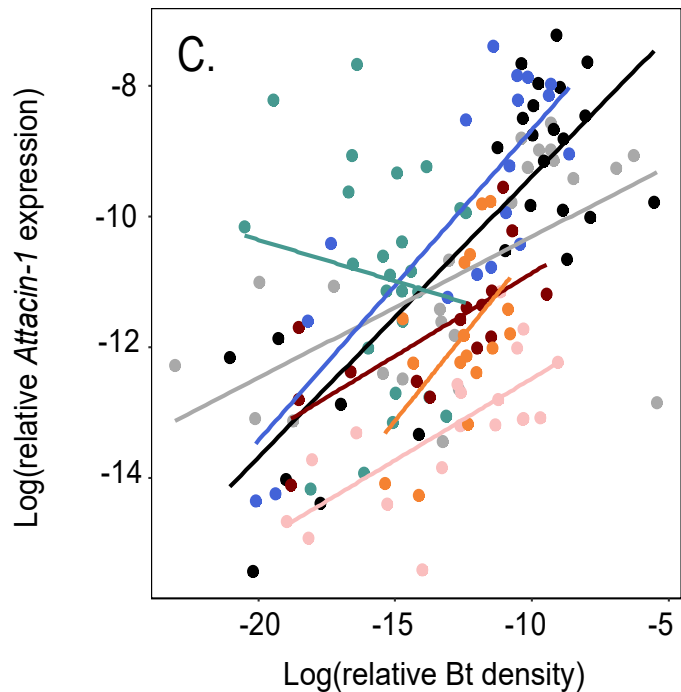**Inducible**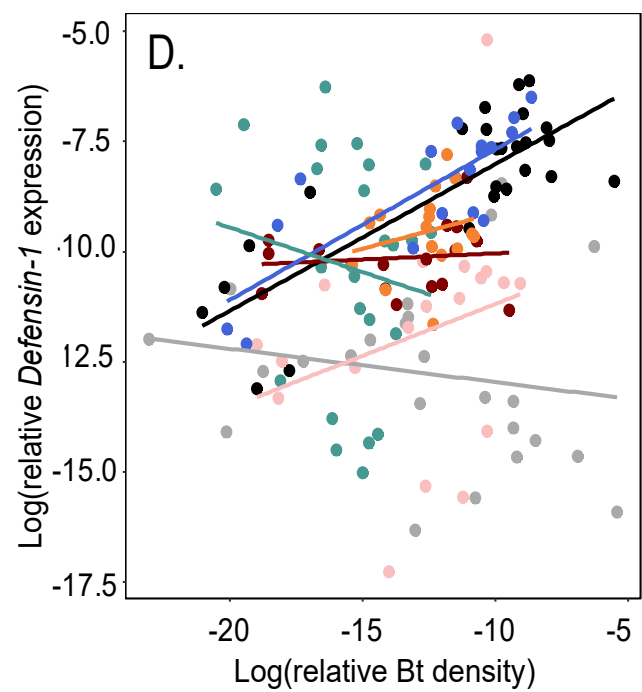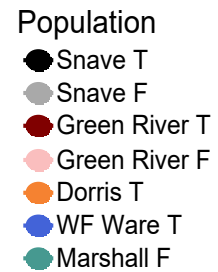

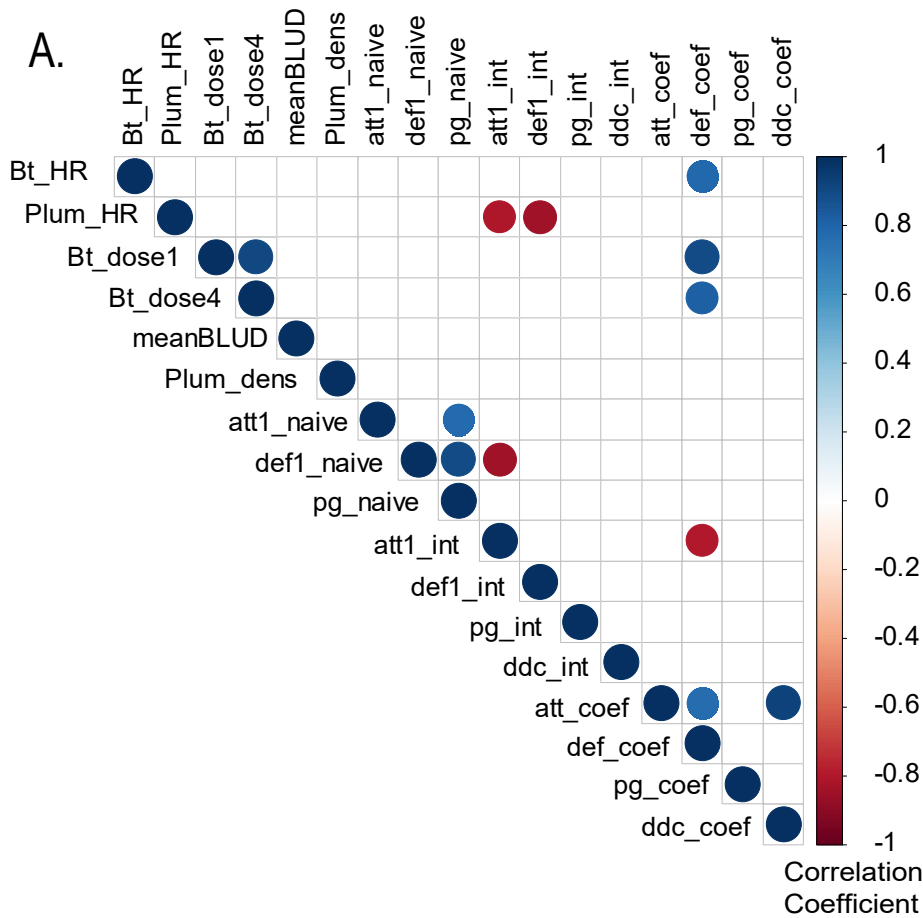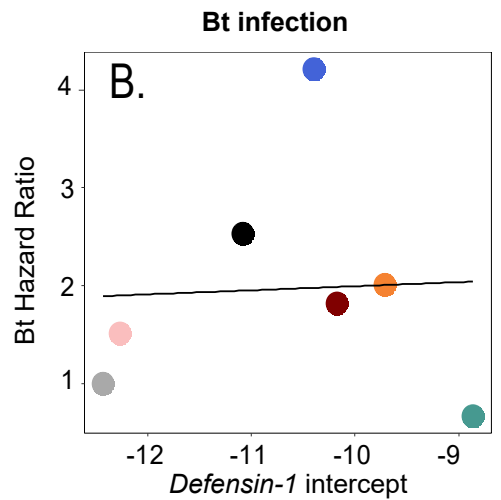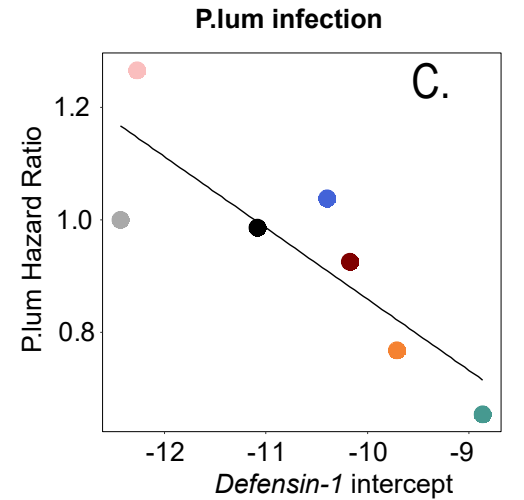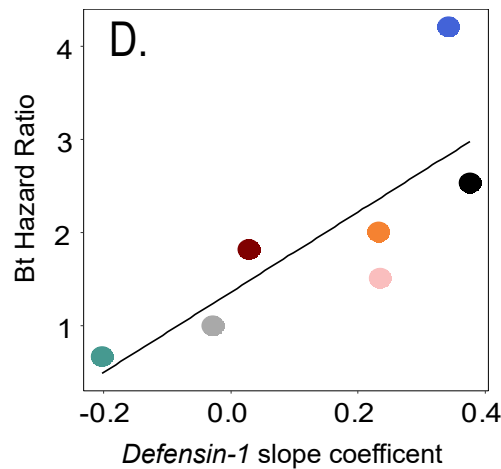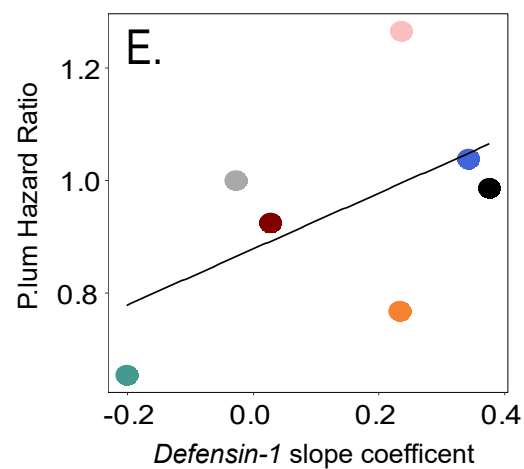

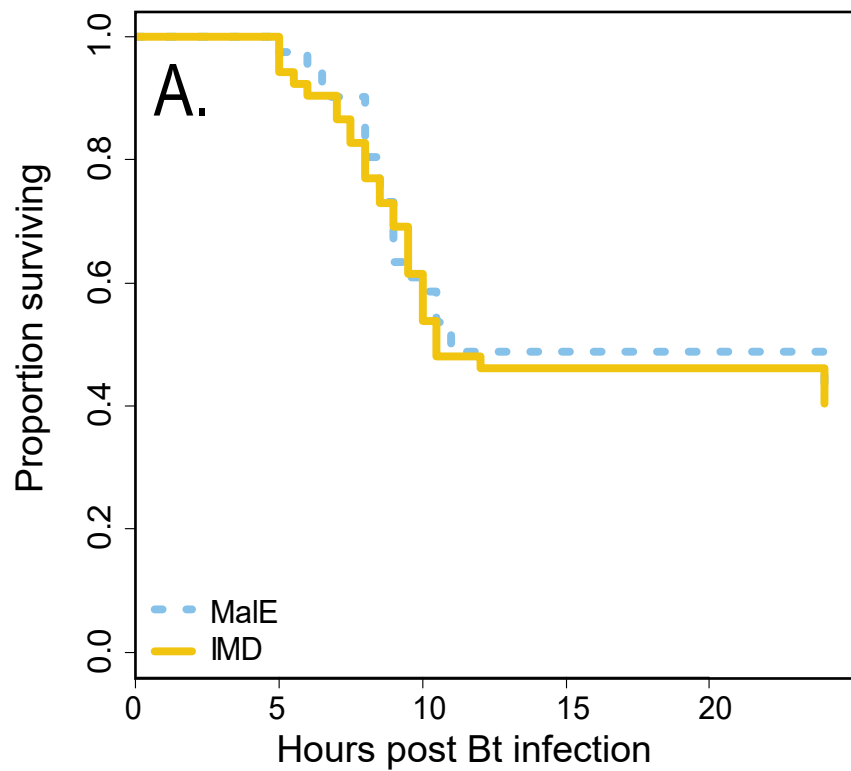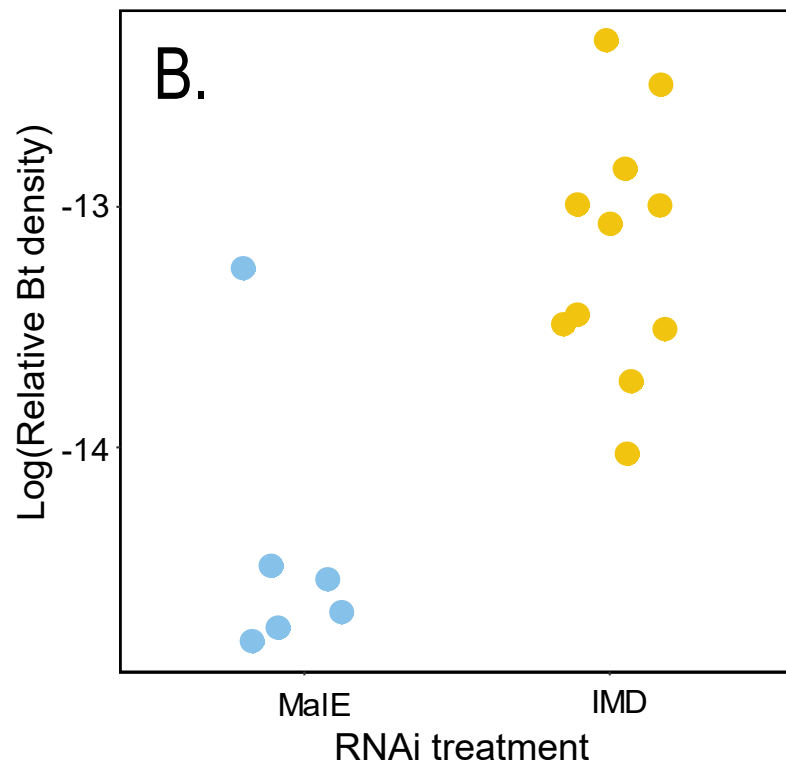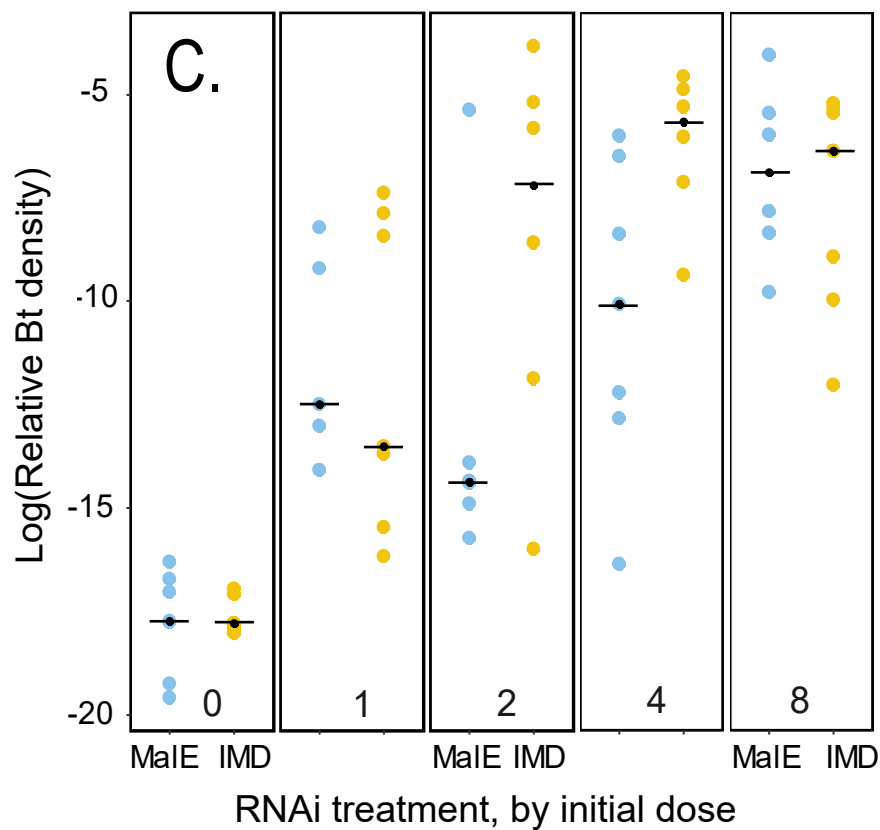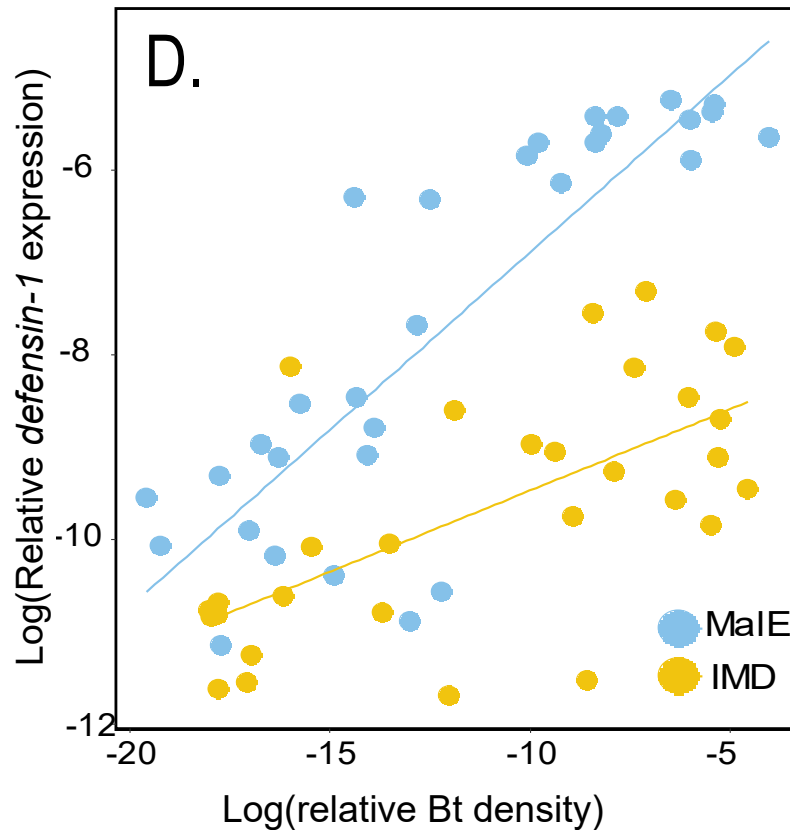

Source: https://www.biorxiv.org/content/10.1101/788281v1.full.pdf
